# Supplementary material for: Cannabis Use Is Inversely Associated with Metabolic Disorders in Hepatitis C-Infected Patients (ANRS CO22 Hepather Cohort)
Source: MDPI journal article supplement (doi:10.3390/jcm11206135), 2022-10-18
Supplement: s1 [file s1]

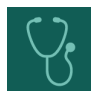

**Supplementary Table S1.** Presence of metabolic disorders in the study population at enrolment (ANRS CO22 Hepather cohort, n=6364).

|                                                       | Participants with central obesity (n=3523) |      | Participants with dyslipidemia (n=520) |      | Participants with hypertension (n=1832) |      | Participants with diabetes (n=817) |      |
|-------------------------------------------------------|--------------------------------------------|------|----------------------------------------|------|-----------------------------------------|------|------------------------------------|------|
|                                                       | n                                          | %    | n                                      | %    | n                                       | %    | n                                  | %    |
| Participants with one metabolic disorder (n=2376)     | 1823                                       | 76.7 | 101                                    | 4.3  | 343                                     | 14.4 | 109                                | 4.6  |
| Participants with two metabolic disorders (n=1304)    | 1186                                       | 91.0 | 156                                    | 12.0 | 976                                     | 74.8 | 290                                | 22.2 |
| Participants with three metabolic disorders (n=448)   | 423                                        | 94.4 | 172                                    | 38.4 | 422                                     | 94.2 | 327                                | 73.0 |
| Participants with all four metabolic disorders (n=91) | 91                                         | 100  | 91                                     | 100  | 91                                      | 100  | 91                                 | 100  |
