# Supplementary material for: Cannabis Use Is Inversely Associated with Metabolic Disorders in Hepatitis C-Infected Patients (ANRS CO22 Hepather Cohort)
Source: MDPI journal article supplement (doi:10.3390/jcm11206135), 2022-10-18
Supplement: s1 [file s1]

**Supplementary Table S2:** Factors associated with diabetes (univariable and multivariable logistic regression models, ANRS CO22 Hepather cohort, n=6364)

| Variables                                         | Univariable analyses                |                    | Multivariable analyses               |                    |
|---------------------------------------------------|-------------------------------------|--------------------|--------------------------------------|--------------------|
|                                                   | Diabetes<br>(n=6364)<br>OR [95% CI] | P-value            | Diabetes<br>(n=5845)<br>aOR [95% CI] | P-value            |
| <b>Gender</b>                                     |                                     |                    |                                      |                    |
| Male (ref.)                                       | 1                                   |                    | 1                                    |                    |
| Female                                            | 0.75 [0.64 – 0.87]                  | < 10 <sup>-3</sup> | 0.58 [0.49 – 0.69]                   | < 10 <sup>-3</sup> |
| <b>Age (years)</b>                                | 1.04 [1.03 – 1.05]                  | < 10 <sup>-3</sup> | 1.03 [1.02 – 1.03]                   | < 10 <sup>-3</sup> |
| <b>Place of birth</b>                             |                                     |                    |                                      |                    |
| France (ref.)                                     | 1                                   | < 10 <sup>-3</sup> | 1                                    | < 10 <sup>-3</sup> |
| Europe and America †                              | 0.95 [0.70 – 1.29]                  | 0.721              | 0.95 [0.68 – 1.31]                   | 0.741              |
| North Africa and Middle East                      | 2.50 [2.02 – 3.10]                  | < 10 <sup>-3</sup> | 2.02 [1.60 – 2.56]                   | < 10 <sup>-3</sup> |
| Sub-Saharan Africa ‡                              | 2.16 [1.68 – 2.77]                  | < 10 <sup>-3</sup> | 2.73 [2.03 – 3.69]                   | < 10 <sup>-3</sup> |
| Asia                                              | 1.21 [0.79 – 1.85]                  | 0.377              | 1.37 [0.87 – 2.15]                   | 0.172              |
| <b>Coffee consumption</b>                         |                                     |                    |                                      |                    |
| 0 cup/day (ref.)                                  | 1                                   | < 10 <sup>-3</sup> | 1                                    | <b>0.044</b>       |
| 1-2 cups/day                                      | 1.11 [0.93 – 1.32]                  | 0.238              | 1.25 [1.03 – 1.53]                   | 0.024              |
| ≥ 3 cups/day                                      | 0.68 [0.55 – 0.83]                  | < 10 <sup>-3</sup> | 1.05 [0.83 – 1.34]                   | 0.671              |
| <b>Cannabis use</b>                               |                                     |                    |                                      |                    |
| Never (ref.)                                      | 1                                   | < 10 <sup>-3</sup> | 1                                    | < 10 <sup>-3</sup> |
| Former                                            | 0.57 [0.46 – 0.70]                  | < 10 <sup>-3</sup> | 0.75 [0.59 – 0.96]                   | 0.024              |
| Current                                           | 0.34 [0.25 – 0.46]                  | < 10 <sup>-3</sup> | 0.37 [0.25 – 0.55]                   | < 10 <sup>-3</sup> |
| <b>Tobacco use</b>                                |                                     |                    |                                      |                    |
| Never (ref.)                                      | 1                                   | < 10 <sup>-3</sup> | 1                                    | <b>0.017</b>       |
| Former                                            | 1.08 [0.91 – 1.29]                  | 0.362              | 1.35 [1.10 – 1.65]                   | 0.004              |
| Current                                           | 0.61 [0.51 – 0.74]                  | < 10 <sup>-3</sup> | 1.17 [0.91 – 1.50]                   | 0.224              |
| <b>Alcohol consumption §</b>                      |                                     |                    |                                      |                    |
| Abstinent without history of unhealthy use (ref.) | 1                                   | < 10 <sup>-3</sup> |                                      |                    |
| Moderate use                                      | 0.67 [0.57 – 0.79]                  | < 10 <sup>-3</sup> |                                      |                    |
| Current or past unhealthy use                     | 0.96 [0.79 – 1.18]                  | 0.717              |                                      |                    |
| <b>Living in poverty ¶</b>                        |                                     |                    |                                      |                    |
| No (ref.)                                         | 1                                   |                    |                                      |                    |
| Yes                                               | 1.35 [1.15 – 1.57]                  | < 10 <sup>-3</sup> |                                      |                    |
| <b>Educational level</b>                          |                                     |                    |                                      |                    |
| < upper secondary school certificate (ref.)       | 1                                   |                    | 1                                    |                    |
| ≥ upper secondary school certificate              | 0.63 [0.54 – 0.73]                  | < 10 <sup>-3</sup> | 0.70 [0.59 – 0.82]                   | < 10 <sup>-3</sup> |
| <b>Employment status</b>                          |                                     |                    |                                      |                    |

|                                         |                    |                    |                    |                    |
|-----------------------------------------|--------------------|--------------------|--------------------|--------------------|
| Having no job (ref.)                    | 1                  |                    | 1                  |                    |
| Having a job                            | 0.44 [0.38 – 0.52] | < 10 <sup>-3</sup> | 0.68 [0.56 – 0.83] | < 10 <sup>-3</sup> |
| <b>Advanced liver fibrosis † †</b>      |                    |                    |                    |                    |
| No (ref.)                               | 1                  |                    | 1                  |                    |
| Yes                                     | 2.30 [1.97 – 2.69] | < 10 <sup>-3</sup> | 1.80 [1.51 – 2.14] | < 10 <sup>-3</sup> |
| <b>Time since HCV diagnosis (years)</b> | 1.01 [1.00 – 1.02] | 0.144              |                    |                    |
| <b>HCV genotype</b>                     |                    |                    |                    |                    |
| 1 (ref.)                                | 1                  | <b>0.007</b>       |                    |                    |
| 3                                       | 0.73 [0.57 – 0.95] | 0.017              |                    |                    |
| 4                                       | 1.26 [1.02 – 1.56] | 0.036              |                    |                    |
| 2/5/6/7                                 | 1.04 [0.81 – 1.34] | 0.746              |                    |                    |

† The category ‘Europe and America’ included participants from South America (n=19), North America (n=15), Central America (n=4), Australia (n=2) and Russia (n=32). ‡ The category ‘Sub-Saharan Africa’ included participants from the Caribbean (n=10). § Unhealthy alcohol use was defined as > 2 and > 3 standard drinks per day for women and men, respectively, in accordance with the French National Authority for Health <sup>34</sup> ¶ Poverty was defined as a standard of living lower than the 2015 French poverty threshold (1015 euros) <sup>35</sup> † † Advanced liver fibrosis was defined as a FIB-4 score > 3.25 <sup>36</sup>. aOR, adjusted odds ratio; CI, confidence interval; HCV, hepatitis C virus; OR, odds ratio.
